# Supplementary material for: Efficacy and safety of first-line or second-line selective laser trabeculoplasty for normal-tension glaucoma: a multicentre cohort study
Source: PubMed Central journal article supplement — BMJ Open Ophthalmol. 2024 Apr 15;9(1):e001563. doi: 10.1136/bmjophth-2023-001563 (PMC11029453; doi:10.1136/bmjophth-2023-001563), 2024-04-15
Supplement: bmjophth-2023-001563supp002.pdf [file bmjophth-2023-001563supp002.pdf]

**Supplemental Figure 1.** Scatter plot of pre-selective laser trabeculoplasty intraocular pressure (IOP) and IOP at 3 months after SLT.

Below the dotted line are cases with an IOP reduction rate of 20% or more. Scatter plot shows that approximately half patients achieved a reduction in IOP of  $\geq 20\%$  at 3 months after SLT.
