# Supplementary material for: Efficacy and safety of first-line or second-line selective laser trabeculoplasty for normal-tension glaucoma: a multicentre cohort study
Source: PubMed Central journal article supplement — BMJ Open Ophthalmol. 2024 Apr 15;9(1):e001563. doi: 10.1136/bmjophth-2023-001563 (PMC11029453; doi:10.1136/bmjophth-2023-001563), 2024-04-15
Supplement: bmjophth-2023-001563supp004.pdf [file bmjophth-2023-001563supp004.pdf]

**Supplemental Table 1.** Multiple Linear Regression Analysis of Association between Factors and Intraocular Pressure Reduction at 12 Months.

| <b>Parameter</b>                      | <b>Beta</b> | <b>Lower<br/>95% CI</b> | <b>Upper<br/>95% CI</b> | <b>P value</b> |
|---------------------------------------|-------------|-------------------------|-------------------------|----------------|
| <b>Univariate linear regression</b>   |             |                         |                         |                |
| Preoperative IOP                      | 2.81        | 0.463                   | 2.516                   | 0.005          |
| IOP reduction at 3 months             | 0.445       | 0.257                   | 0.627                   | <0.001         |
| MD                                    | 0.064       | -0.363                  | 0.685                   | 0.544          |
| Total energy of SLT                   | -0.040      | -0.123                  | 0.083                   | 0.702          |
| CCT                                   | -0.226      | -0.138                  | -0.007                  | 0.029          |
| Preoperative medication               | -0.196      | -8.962                  | 0.188                   | 0.060          |
| <b>Multivariate linear regression</b> |             |                         |                         |                |
| Preoperative IOP                      | 0.269       | 0.365                   | 2.403                   | 0.008          |
| IOP reduction at 3 months             | 0.353       | 0.162                   | 0.538                   | <0.001         |
| MD                                    | -0.009      | -0.484                  | 0.439                   | 0.923          |
| Total energy of SLT                   | -0.119      | -0.150                  | 0.031                   | 0.196          |
| CCT                                   | -0.259      | -0.144                  | -0.023                  | 0.008          |

IOP=intraocular pressure; CI=confidence interval; MD=mean deviation; SLT=selective laser trabeculoplasty; CCT=central corneal thickness.
