# Supplementary material for: Efficacy and safety of first-line or second-line selective laser trabeculoplasty for normal-tension glaucoma: a multicentre cohort study
Source: PubMed Central journal article supplement — BMJ Open Ophthalmol. 2024 Apr 15;9(1):e001563. doi: 10.1136/bmjophth-2023-001563 (PMC11029453; doi:10.1136/bmjophth-2023-001563), 2024-04-15
Supplement: bmjophth-2023-001563supp005.pdf [file bmjophth-2023-001563supp005.pdf]

**Supplemental Table 2.** Summary of Selective Laser Trabeculoplasty-related Adverse Events.

| <b>Adverse events during SLT</b> | <b>Total number of events</b> | <b>(%)</b> |
|----------------------------------|-------------------------------|------------|
| Conjunctival hyperemia           | 19                            | 19.2       |
| Anterior chamber cells           | 65                            | 65.7       |
| <b>Adverse events post-SLT</b>   | <b>Total number of events</b> | <b>(%)</b> |
| Conjunctival hyperemia           | 7                             | 7.1        |
| Anterior chamber cells           | 9                             | 9.1        |
| Macular edema                    | 1                             | 1.0        |
| Blurred/altered vision           | 11                            | 11.1       |
| Photophobia                      | 5                             | 5.1        |
| Discomfort (ocular or headache)  | 12                            | 12.1       |

SLT=selective laser trabeculoplasty.
