# Supplementary figures and images for: Efficacy and safety of first-line or second-line selective laser trabeculoplasty for normal-tension glaucoma: a multicentre cohort study
Source: PubMed Central journal article supplement — BMJ Open Ophthalmol. 2024 Apr 15;9(1):e001563. doi: 10.1136/bmjophth-2023-001563 (PMC11029453; doi:10.1136/bmjophth-2023-001563), 2024-04-15

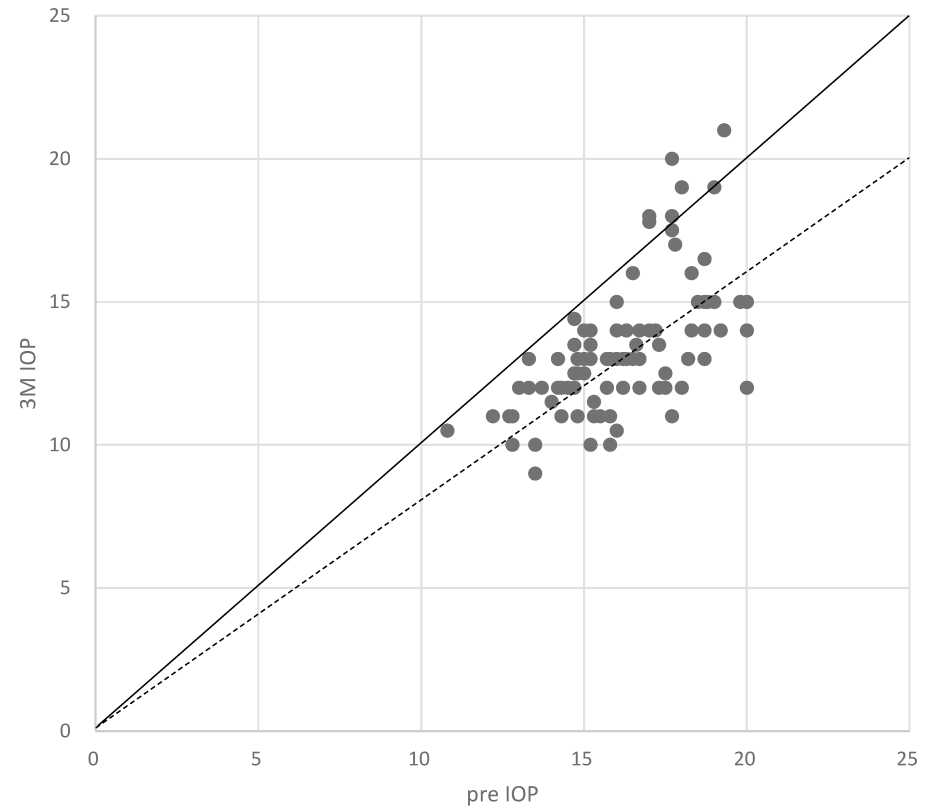

Supplement: bmjophth-2023-001563supp003.pdf [file bmjophth-2023-001563supp003.pdf]
